1 **A mitochondria-targeted antioxidant and a thyroid hormone affect**  
2 **carotenoid ketolase gene expression and bill redness in zebra finches**

3

4 Alejandro Cantarero<sup>1,2</sup>, Pedro Andrade<sup>3</sup>, Miguel Carneiro<sup>3</sup>, Adrián Moreno-Borrillo<sup>2</sup>  
5 and Carlos Alonso-Alvarez<sup>2\*</sup>

6

7 AC ORCID: 0000-0002-5816-701X; PA: 0000-0003-2540-2471; MC: 0000-0001-9882-7775;  
8 CAA: 0000-0002-4765-551X

9

10 <sup>1</sup> Section of Ecology, Department of Biology, University of Turku, Turku 20014, Finland.

11 <sup>2</sup> Departamento de Ecología Evolutiva. Museo Nacional de Ciencias Naturales - CSIC.  
12 C/ José Gutiérrez Abascal 2, 28006 Madrid, Spain

13 <sup>3</sup> CIBIO/InBIO, Centro de Investigação em Biodiversidade e Recursos Genéticos,  
14 Campus Agrário de Vairão, Universidade do Porto, 4485-661, Vairão, Portugal.

15

16 Author contributions: AC, MC and PC, AMB, CAA

17 AC and CAA designed the study, carried out the experiment and analysed data;

18 CAA led the writing of the manuscript;

19 MC, PC and AMB were involved in laboratory analyses;

20

21 Data will be publicly available at <https://digital.csic.es> when finally accepted.

22 \*Corresponding author, email: [carlos.alonso@csic.es](mailto:carlos.alonso@csic.es)

23 Telephone number: +34 91 411 13 28 – 988978

24 **Acknowledgements**

25 We thank Luisa Amo for providing us with some of the birds in the experiment and Lucía  
26 Arregui and Diego Gil for assistance in thyroid hormone quantification. Financial support  
27 was obtained from the project CGL2015-69338-C2-2-P (MINECO). AC is currently  
28 supported by a postdoctoral fellowship from Fundación Ramón Areces. The experiment  
29 was approved by the Bioethics Committee of CSIC and Junta de Castilla La Mancha  
30 (JCCM) government (ref number 16-2017).

31 **ABSTRACT**

32 Conspicuous ornaments in animals can evolve to reveal individual quality when their  
33 production/maintenance costs make them reliable as signals or if their expression level is  
34 intrinsically linked to quality by some unfalsifiable mechanism (quality indices). The  
35 latter has been mostly associated with traits constrained by body size. However, red  
36 ketocarotenoid-based coloured ornaments may also have evolved as quality indices  
37 because their production could be closely linked to individual metabolism and,  
38 particularly, to the cell respiration at the inner mitochondrial membrane (IMM). This  
39 mechanism would supposedly not depend on resource (yellow carotenoids) availability,  
40 thus discarding allocation trade-offs. A gene coding for a ketolase enzyme (*CYP2J19*)  
41 responsible for converting dietary yellow carotenoids to red ketocarotenoids has recently  
42 been described in birds. It is not known, however, if this ketolase is involved in  
43 mitochondrial metabolism and if its expression level and activity is resource independent.  
44 Here, we manipulated the metabolism of captive male zebra finches by an antioxidant  
45 designed to penetrate the IMM (mitoTEMPO) and a thyroid hormone (triiodothyronine;  
46 T3) with known hypermetabolic effects. The expression levels of a ketocarotenoid-based  
47 ornament (bill redness) and *CYP2J19* were measured. MitoTEMPO downregulated  
48 *CYP2J19* expression, supporting the mitochondrial involvement in ketolase function. T3  
49 also reduced *CYP2J19* expression, but at an intermediate dosage, this effect being  
50 buffered by mitoTEMPO. Bill redness seemed to show a similar interacting effect.  
51 Nevertheless, this faded when *CYP2J19* expression level was controlled for as a  
52 covariate. We argue that the well-known mitoTEMPO effect in reducing mitochondrial  
53 reactive oxygen species (ROS) production (particularly superoxide) could have interfered  
54 on redox signalling mechanisms controlling ketolase transcription. High T3 levels,  
55 contrarily, can lead to high ROS production but also trigger compensatory mechanisms,

56 which may explain the U-shaped effect with dosage on *CYP2J19* expression levels. Bill  
57 *CYP2J19* expression values were also positively correlated to redness and circulating  
58 substrate carotenoid levels. Nonetheless, treatment effects did not change when  
59 controlling for blood carotenoid concentration, suggesting that resource-availability  
60 dependence was irrelevant. Finally, our findings reveal a role for thyroid hormones in the  
61 expression of carotenoid-based ornaments that has virtually been ignored until now.

62

63 **Keywords:** cell metabolism, electron transport chain, mito-targeted antioxidants,  
64 oxidative stress, red colourations, sexual selection, sexual signalling, *Taeniopygia*  
65 *guttata*.

## 66 **Introduction**

67 The animal signalling theory proposes that traits involved in animal communication, such  
68 as many conspicuous ornaments and songs, evolve (1) due to production/maintenance  
69 costs that prevent cheating by low-quality individuals (Grafen 1990) or (2) because the  
70 level of expression of the trait directly reveals individual quality (i.e. they cannot be  
71 faked; Maynard Smith & Harper 2003). The first type of trait has often been defined as  
72 “signals” (or “handicap signals”), whereas the second type of trait has been defined as  
73 “indices” (e.g. Johnstone 1995; Weaver, Koch & Hill 2017). The expression level of  
74 sexual “signals” should in some way correlate positively with reproductive success, but  
75 negatively to survival, due to some direct or indirect costs of trait  
76 production/maintenance. Instead, an “index” should positively correlate to both  
77 reproductive success and survival (i.e. no trade-off should exist; Vanhooydonck *et al.*  
78 2007) and is supposedly cost-free (but see Biernaskie, Grafen & Perry 2014). Most  
79 examples of indices have been associated with traits (e.g. deer antlers or calling rates) that  
80 depend or are positively correlated to body size (Maynard Smith & Harper 2003; Reby &  
81 McComb 2003).

82       However, a new quite different type of index has been proposed in the form of  
83 conspicuous colourations produced by red carotenoid pigments (Hill 2011; Weaver *et al.*  
84 2017). Red carotenoid-based ornaments are present in many vertebrates. They have  
85 attracted much attention from evolutionary ecologists as its proximate production  
86 mechanisms are intriguingly complex (e.g. McGraw 2006). Such complexity is, however,  
87 becoming to be disentangled (e.g. Johnson & Hill 2013; Lopes *et al.* 2016; Mundy *et al.*  
88 2016), providing material to propose new evolutionary hypotheses in the signalling theory  
89 framework (Hill 2011). The underlying question is why these mechanisms have promoted  
90 the selection of red ornaments as reliable information transmitters.

91 Carotenoids are molecules whose chromophore generates yellow to red  
92 colourations (Britton 2008). The animal organism cannot synthesize them from any non-  
93 carotenoid substrate, but some carotenoids can be transformed into others by enzymatic  
94 reactions (Stradi *et al.* 1997; McGraw 2006; García-de Blas, Mateo & Alonso-Alvarez  
95 2016). This is the case of red ketocarotenoids (e.g. astaxanthin, canthaxanthin) obtained  
96 from dietary yellow-to-orange carotenoids (e.g. lutein, zeaxanthin). This mechanism has  
97 been well studied in birds (McGraw 2006). Many aquatic bird species can easily obtain  
98 red ketocarotenoids from their food and directly allocate them to ornaments without  
99 transformation because ketocarotenoids are abundant in aquatic invertebrate prey (e.g.  
100 crustaceans; McGraw 2006). However, among terrestrial birds, ketocarotenoids are often  
101 scarce in food (particularly in vegetal food) and molecular mechanisms allowing to  
102 transform yellow to red pigments have evolved (McGraw 2006). Currently, the only  
103 candidate gene implicated in this transformation and well-supported by molecular studies  
104 is *CYP2J19* (Lopes *et al.* 2016; Mundy *et al.* 2016; Twyman *et al.* 2016; 2018). This is a  
105 member of the cytochrome p450 family of enzymes, most of its members being involved  
106 in the metabolism of toxicants but also in hormone synthesis (Tompkins & Wallace  
107 2007).

108 Before the discovery of *CYP2J19*, some researchers argued that the candidate  
109 enzyme should be linked to mitochondrial activity (Hill 2011; Johnson & Hill 2013).  
110 They argued that the molecular similarity between some ketocarotenoids and ubiquinone,  
111 which is a key antioxidant involved in the cell respiratory chain, implies that the enzyme  
112 could be part of the ubiquinone enzymatic biosynthesis pathway (Johnson & Hill 2013).  
113 The transformation would, hence, be made in the inner mitochondrial membrane (IMM)  
114 probably sharing a biochemical pathway with cell respiration. The theoretical link to the  
115 mitochondria metabolism led these authors (see Hill 2011; Hill & Johnson 2012) to

116 propose that red ketocarotenoid based ornaments evolved as “indices” of individual  
117 quality as they would be tightly linked to basic metabolic pathways such as cell  
118 respiration.

119 The subsequent description of *CYP2J19* could support this hypothesis if the  
120 enzyme is indeed placed at the IMM affecting cell respiration. The recent finding of  
121 relatively high levels of ketocarotenoids at the IMM compared to other cell fractions is  
122 consistent with this scenario (Hill *et al.* 2019). Moreover, the treatment of male zebra  
123 finches (*Taeniopygia guttata*) with a synthetic ubiquinone (mitoQ; Smith *et al.* 2003)  
124 designed to penetrate into the IMM has been shown to increase bill redness (Cantarero &  
125 Alonso-Alvarez 2017), which is a ketocarotenoid-based sexually selected ornament  
126 (McGraw & Toomey 2010).

127 In the present study, we exposed male zebra finches to another synthetic mito-  
128 targeted antioxidant, testing, for the first time, potential changes in bill *CYP2J19*  
129 expression levels. This experiment allows us to infer if mitochondria metabolism is  
130 indeed linked to the candidate gene and if that connection affects trait expression  
131 (redness). The antioxidant (i.e. mitoTEMPO: (2-(2,2,6,6-Tetramethylpiperidin-1-oxyl-4-  
132 ylamino)-2-oxoethyl)triphenylphosphonium chloride; Dikalova *et al.* 2010) is similar to  
133 mitoQ. In both molecules, the antioxidant is joined to a triphenylphosphonium cation  
134 (TPP<sup>+</sup>) specifically designed to penetrate into the IMM (Murphy & Smith 2007). In  
135 mitoQ, TPP<sup>+</sup> is connected to the antioxidant by a 10-carbon alkyl chain (i.e. decyl-TPP<sup>+</sup>).  
136 The length of this molecule, however, increases membrane permeability, inhibiting the  
137 electron transport chain and rising superoxide radical generation (Reily *et al.* 2013; Trnka,  
138 Elkalaf & Anděl 2015; Gottwald *et al.* 2018). Consistent with these negative effects, zebra  
139 finches only treated with decyl-TPP<sup>+</sup> developed paler bills than controls (Cantarero &  
140 Alonso-Alvarez 2017). In contrast, mitoTEMPO does not include that linker group and

141 the antioxidant role is played by piperidine nitroxide, which recycles ubiquinol (the  
142 reduced ubiquinone form) to ubiquinone (Trnka *et al.* 2008). This lowers mitochondrial  
143 superoxide radical concentration (Dikalova *et al.* 2010). Moreover, we have recently  
144 found that mitoTEMPO is able to increase ketocarotenoid-based feather redness in males  
145 from another bird species (the red crossbill; *Loxia curvirostra*; Cantarero *et al.* 2019  
146 preprint).

147         Here, we aimed to go further by artificially increasing the level of the most active  
148 thyroid hormone (triiodothyronine; T3), testing its impact on both *CYP2J19* expression  
149 and redness. Virtually nothing is known about the potential involvement of thyroid  
150 hormones in animal carotenoid-based ornaments. However, thyroid hormones control  
151 oxygen consumption and have hypermetabolic effects mediated by changes in  
152 mitochondria metabolism (Hwang-Bo, Muramatsu & Okumura 1990; Chastel, Lacroix &  
153 Kersten 2003; Seifert *et al.* 2008). High blood levels of thyroid hormones are commonly  
154 associated with higher oxidative stress, and higher reactive oxygen species (ROS)  
155 production, particularly mitochondrial superoxide production (reviewed e.g. in Venditti  
156 & Meo 2006; Collin *et al.* 2009; Elnakish *et al.* 2015; Chainy & Sahoo 2019). High  
157 oxidative stress may, in turn, exert an inhibitory effect on the activity of CYP enzymatic  
158 activity (Zangar, Davydov & Verma 2004). Moreover, high thyroid levels have also been  
159 linked to reduced expression of some CYP genes (Honkakoski & Negishi 2000; Kot &  
160 Daniel 2011). Accordingly, and also taking into account the precedent results (i.e.  
161 Cantarero & Alonso-Alvarez 2017; Cantarero *et al.* 2019 preprint), we hypothesized that  
162 mitoTEMPO should increase *CYP2J19* activity and bill redness, whereas high T3 levels  
163 should decrease them, both treatments interacting perhaps to cancel out their respective  
164 effects.

165



## 166 **Material and Methods**

### 167 Experimental protocol

168 Eighty-six male zebra finches were housed in cages placed within an indoor aviary (more  
169 details in Supplementary Material, SM). Two birds were housed per cage (0.6 m × 0.4 m  
170 × 0.4 m). The pair was divided by a grille hindering physical contact. After an 8-day  
171 acclimation period, all the birds were randomly assigned to the treatments. All of them  
172 received a subcutaneous silicone implant (OD 1.96 mm, ID 1.477 mm; Silastic®) empty  
173 or filled with T3 (3,3',5-Triiodo-L-thyronine; SIGMA ref. T2822; see also SM). The T3-  
174 filled implants were made at different lengths (6 mm, 8 mm and 10 mm) to produce  
175 different dosages. Control birds ( $n = 22$ ) received a 10 mm empty implant. The largest  
176 length was chosen considering recent studies in Gambel's white-crowned sparrows  
177 (*Zonotrichia leucophrys gambelii* (Perez *et al.* 2016; 2018). Lower dosages were included  
178 considering that sparrows are heavier than finches (26 vs. 15 gr approx., respectively).  
179 The implants were put in two consecutive days due to time constraints. Thirty-five birds  
180 rejected the implant 2-7 days before the end of the experiment (mean ± SD:  $3 \pm 1.2$  days).  
181 The treatment distribution among birds losing or maintaining the implant never differs  
182 (i.e. by testing both treatments separately or a single eight-level factor all  $\chi^2$  tests:  $p$   
183  $>0.26$ ). The number of days with implant also did not differ among treatments (non-  
184 parametric Kruskal-Wallis or Mann-Whitney U's tests: all  $p$ -values  $>0.30$ ). This variable  
185 never produced a significant effect (all  $p$ -values  $> 0.10$ ) when tested as a covariate in  
186 every statistical model, and was therefore removed (see below).

187 Each implant group (Control [C], 6 mm [T3-1], 8 mm [T3-2], 10 mm [T3-3]) was  
188 divided by half (9-11 birds per group) to assign the antioxidant treatment (Serum [S] or  
189 MitoTEMPO [MT]). This was administered by subcutaneous injections in the skin of the  
190 back. MT-treated birds received mitoTEMPO at 1.6 mg/ml in 50  $\mu$ l saline. S-treated birds

191 received the same saline volume only. MT-treated birds received 80 µg of mitoTEMPO  
192 every other day to a total of seven doses (2.67 mg/Kg/day). First injections were  
193 performed two days after the surgery to allow birds' recovery and ended 14 days after.  
194 The mitoTEMPO dosage was chosen from results described in mice (Vendrov *et al.*  
195 2015), from a precedent pilot study in zebra finches, and also from an experiment in red  
196 crossbills (see also SM).

197       Blood samples, digital pictures of the bill, and body mass measures were taken  
198 five days before the implant date and again on the last day of the experiment. Blood  
199 samples were stored in a cold box and centrifuged 10 min at 12,000 rpm within 8h of  
200 sampling. Plasma was stored at -80°C until analyses. Body condition (i.e. std. residuals  
201 of tarsus length on body mass) was similarly distributed among the treatments and its  
202 interaction (all  $\chi^2$  tests:  $p > 0.10$ ). The treatments were randomly distributed across the  
203 aviary (cage rows and columns). Nonetheless, the two birds in each cage belonged to the  
204 same antioxidant treatment. The identity of the cage was, anyway, included as a random  
205 term in all statistical models to control for pseudo-replication. One bird (T3-1 and  
206 mitoTEMPO-treated) died by unknown reasons the day after the start of the experiment  
207 and was removed from the dataset.

208       Finally, the occurrence of a body feather moult was visually established at the end  
209 of the experiment by the same observer (AC). Birds were classified as engaged or not in  
210 moult (49 vs 36%, respectively).

211

## 212 Thyroid hormone analyses

213 T3 levels were assessed from one plasma aliquot obtained in the last blood sampling  
214 event. Hormone values were measured by means of commercial species-independent

215 ELISA kits (Arbor Assays, Ann Arbor, MI; ref. K056-H1). The analyses were made twice  
216 per sample in three sessions (intra- and inter-assay CVs = 10.2 and 14.8 %, respectively;  
217 see also SM).

218

#### 219 Respiratory frequency

220 With the aim of validating the hypermetabolic effect of thyroid hormones (e.g. Harper &  
221 Seifert 2008), the respiratory frequency was measured just before each blood sampling  
222 event by the same observer (AC). The number of breast movements in 90 seconds was  
223 counted by handing each bird face up at the left hand, with the head between the middle  
224 and forefinger (Fucikova *et al.* 2009).

225

#### 226 Plasma carotenoids

227 Total carotenoid levels in plasma were determined at the start and end of the experiment  
228 by means of spectrophotometry. Samples were diluted in ethanol, centrifuged and  
229 supernatant absorbance measured at 450 nm. The concentrations were calculated from a  
230 lutein standard curve (full description in SM). This protocol was modified from Hargitai  
231 *et al.* (2009).

232

#### 233 Gene expression

234 At the end of the experiment, a small layer of the upper surface of the upper mandible  
235 (1mm<sup>3</sup> approx.) was taken with a small scalpel. The wound was disinfected and covered  
236 with blastoestimulina cream ® (Almirall labs, Spain; composed by *Centella asiatica*  
237 extract plus neomycin). All birds fully recovered in less than five weeks. The biopsied  
238 tissue was immediately introduced in RNAlater at 1:20 volume approximately and stored  
239 frozen (-20°C) until the analyses. Total RNA was extracted using the RNeasy Mini Kit

240 (Qiagen). Residual genomic DNA carry-over was removed using the DNase treatment  
241 from the same kit. Complementary DNA (cDNA) was prepared from total RNA (~1 µg)  
242 using the GRS cDNA Synthesis Kit (GRiSP). Quantitative real-time PCR reactions were  
243 performed on the *CYP2J19* gene (target) on cDNA. Reactions were performed by using  
244 iTaq Universal SYBR Green Supermix (Bio-Rad Laboratories) in a CFX96 Touch Real-  
245 Time PCR Detection System.  $\beta$ -actin was used as housekeeping (control) gene for  
246 normalizing expression levels. Primers for both *CYP2J19* and  $\beta$ -actin were taken from a  
247 previous study (i.e. Mundy *et al.* 2016). Mean cycle threshold (Ct) values of both genes  
248 were obtained from triplicated measures (both Lessells & Boag 1987'  $r$  values = 0.99).  
249 Expression values of target genes are traditionally corrected to the expression of the  
250 control gene using a  $\Delta$ Ct approach, but this assumes that the expression of the control  
251 gene is kept constant across conditions. Since our experiment is likely to influence overall  
252 homeostasis, and therefore impact control gene expression, we obtained normalized Ct  
253 values using the method of Cui *et al.* (2015): normalized value = target\_Ct value – ( $b$  x  
254 control\_Ct value) where  $b$  is the regression coefficient of the linear regression of mean  
255 *CYP2J19* Ct values on mean  $\beta$ -actin Ct values. This normalization removes biases  
256 produced when the housekeeping Ct values correlate to  $\Delta$ -Ct (i.e. *CYP2J19* Ct minus  $\beta$ -  
257 actin Ct; i.e. Cui *et al.* 2015).

258

### 259 Colour measurements

260 Bill redness was determined by means of digital photography (Nikon® D300; full  
261 description in SM). Briefly, each bird was placed laterally and a picture of one side of the  
262 head was taken. Digital photographs were standardized and analysed using the recently  
263 developed 'SpotEgg' software (Gómez & Liñán-Cembrano 2017), an image-processing  
264 tool for automatized analysis of avian colouration that solves the need for linearizing the

265 camera's response to subtle changes in light intensity (Stevens *et al.* 2007). The mean  
266 red, green and blue (RGB) values measured from the lateral area of the bill (upper and  
267 lower mandibles) were used to obtain a hue value from the Foley & van Dam (1982)  
268 algorithm (see also Cantarero & Alonso-Alvarez 2017). Repeatability (Lessells & Boag  
269 1987) calculated on a set of digital photographs measured twice ( $n = 30$ ) was  $r = 0.99$ ,  $p$   
270  $< 0.001$ . Since a low hue means a redder colour, the hue value was reversed (multiplied  
271 by -1 and adding 11 to attain positive values) to obtain a "redness" variable (also SM).

272

### 273 Statistical analyses

274 Generalized linear mixed models (GLMMs) were used to test the treatment effects on the  
275 final values of T3, respiratory frequency, body mass difference, gene expression levels  
276 and redness as dependent variables in separated models (PROC MIXED in SAS version  
277 9.4 software). The body mass difference (g) was calculated by subtracting the final or  
278 intermediate measure (i.e. five days before the end of the experiment) to the initial body  
279 mass (i.e. at the start of the experiment). The moult occurrence was tested by a binomial  
280 model with logit link function (PROC GLIMMIX in SAS). The hormonal treatment (a  
281 four-level factor), the antioxidant treatment (two levels), and the location of the bird into  
282 the cage (right vs. left side), as well as their interactions, were all tested in every model  
283 (also SM). The cage identity was included as a random factor and was non-significant (all  
284  $p$ -values  $> 0.20$ ), except in the bill redness models ( $p < 0.01$ ). Similarly, the laboratory  
285 session in T3 and carotenoid analyses (microplate identity) were included as another  
286 random factor in models testing T3 and carotenoid plasma values, respectively, and they  
287 were also non-significant (three and four-level factor, respectively; all  $p$ -values  $> 0.22$ ).  
288 In any event, random factors were maintained in all the models for coherence (see e.g.  
289 Bolker *et al.* 2009).

290 Some covariates were tested. In those models testing the body mass difference,  
291 the tarsus length was added to test size-independent variability. Bill brightness was  
292 included in the bill redness model to avoid the influence of the total amount (intensity) of  
293 light reflected from the measured surface (McGraw 2006). This allows discarding the  
294 influence of tissue structure (i.e. not pigmentation) on redness values (McGraw 2006).  
295 The bill area used to measure the redness was also tested.

296 The initial value of the dependent variable was additionally included as a covariate  
297 to avoid subtle initial biases. In this regard, the initial redness was calculated as the  
298 standardized residuals obtained from a model including the random factor cage identity  
299 as well as bill brightness and surface as covariates (all significant terms,  $p < 0.02$ ). All  
300 the models were explored by backward and forward stepwise procedures, removing or  
301 including terms ( $p > 0.05$  or  $p \leq 0.05$ , respectively) to obtain the best fitted one. The  
302 lowest AIC criterion also agreed with this procedure. LSD *post hoc*s were used for  
303 pairwise comparisons. Plasma T3 and carotenoid values were log-transformed to attain  
304 normality. Satterthwaite DFs were used. Least square means  $\pm$  standard error (LSM  $\pm$  SE  
305 hereon) from mixed models are reported, excepting for moult occurrence where raw  
306 proportions are given.

307

## 308 **Results**

### 309 Thyroid hormone levels

310 The mitoTEMPO treatment or its interaction with T3 treatment did not report significant  
311 effects on plasma T3 values (both removed at  $p > 0.78$ ). The backward procedure led to  
312 a non-significant T3 treatment factor (i.e.  $F_{3,63.3}=1.50$ ,  $p = 0.184$ ). Nonetheless, T3-2 and  
313 T3-3 showed a trend to significantly higher values of plasma T3 than controls (LSD  
314 pairwise comparisons:  $p = 0.073$  and  $0.059$ , respectively; Figure 1A). When comparing

315 controls versus the other birds grouped in a single group, a significant effect was detected  
316 ( $F_{1,67.3}=4.07, p=0.048$ ; LSM  $\pm$  SE:  $6.66 \pm 1.01$  and  $9.04 \pm 0.60$  ng/mL, respectively).

317

### 318 Respiratory frequency

319 In the model testing respiratory frequency, only the T3 treatment effect remained ( $F_{3,70.7}$   
320 =  $8.64, p < 0.001$ ; initial value:  $F_{1,74.1}= 19.09, p < 0.001$ ). The LSD tests comparing the  
321 control group with each T3 treatment always reported  $p < 0.001$  (Figure 1B; other  
322 pairwise comparisons  $p > 0.62$ ).

323

### 324 Moult occurrence

325 The T3 treatment affected the moult ( $F_{3,81}= 7.28, p < 0.001$ ) — birds with higher doses  
326 being more frequently engaged in moult (5, 55, 85 and 91% respectively, from controls  
327 to higher dosages). Pairwise comparisons were always  $p < 0.048$ , excepting at the two  
328 highest levels ( $p = 0.598$ ). No other factor remained in the model (all  $p > 0.25$ ).

329

### 330 Body mass difference

331 At the intermediate measure, the interaction between both treatments was non-significant  
332 ( $p = 0.301$ ). In the best-fitted model, the antioxidant treatment reported a significant effect  
333 (Table 1). MitoTEMPO-treated birds lost less mass than controls (LSM $\pm$  SE:  $-0.96 \pm 0.09$   
334 and  $-1.23 \pm 0.09$  g, respectively). T3 treatment was also a significant factor (Table 1)  
335 because birds in any hormone-treated group lost more mass than controls (all  
336 comparisons:  $p < 0.001$ ; Figure 2A). The T3-1 vs T3-3 comparison was also significant  
337 ( $p = 0.027$ ). When the final body mass was tested, the treatment interaction reported ( $p =$   
338  $0.085$ ). Only mitoTEMPO-treated birds not exposed to exogenous T3 increased body  
339 mass (Figure 2B), with their weight differing from all other groups (all  $p$ -values  $< 0.028$ ).

340 Serum-only treated birds also differed or tended to significantly differ from birds in T3-  
341 2 and T3-3 dosages ( $p$ -range: 0.018-0.066; other  $p > 0.10$ ). If the interaction is removed,  
342 only the hormone treatment remained ( $F_{3,68.2} = 10.58$ ,  $p < 0.001$ ), controls differing from  
343 any other group (all  $p$ -values  $< 0.001$ ; other  $p$ -values  $> 0.15$ ; see Table S1 and Figure S1).  
344

#### 345 Circulating carotenoids

346 No term reported a significant effect in the model testing plasma carotenoid levels (all  $p$ -  
347 values  $> 0.22$ ).

348

#### 349 CYP2J19 expression

350 The treatments reported a clear highly significant interaction (Table 2). The resulting  
351 figure (Figure 3A) resembled that of bill redness at least in the two highest T3 dosages  
352 (Figure 3B). MT vs S comparisons at T3-0 (controls), T3-2 and T3-3 hormonal dosages  
353 reported  $p = 0.035$ ,  $0.032$  and  $0.055$ , respectively. A global view suggests a U-shape  
354 relationship with hormone dosages among S-injected birds, whereas an inverted U  
355 appears among mitoTEMPO-injected animals. Thus, S-injected birds reported lower  
356 CYP2J19 expression at the medium-sized (T3-2) dosage compared to hormone controls  
357 ( $p = 0.014$ ; other comparisons among S-injected birds:  $p > 0.082$ ). In mitoTEMPO-  
358 treated birds, the control vs T3-2 reported  $p = 0.066$ , suggesting increased gene expression  
359 (Figure 3B). The value then declined at the highest T3 dosage (T3-1 vs T3-3 and T3-2 vs  
360 T3-3: both  $p$ -values  $< 0.027$ ; other comparisons:  $p$ -values  $> 0.17$ ). It is worth noting that  
361 when circulating carotenoids at bill sampling time were added as a covariate, they were  
362 positively correlated to gene expression (slope  $\pm$  SE:  $0.059 \pm 0.029$ ;  $F_{1,72.5} = 4.18$ ,  $p =$   
363  $0.045$ ), but this did not alter the treatment interaction ( $p = 0.013$ ).

364



365 Bill redness

366 The interaction between both treatments reported a trend to significance ( $p = 0.075$ ; Table  
367 2; also SM for descriptions on other significant terms). This was driven by differences  
368 between antioxidant treatments in the two groups with the larger implants (Figure 3A).  
369 In serum-injected birds, bill redness increased between T3-2 and T3-3 doses ( $p = 0.024$ ),  
370 whereas the opposite pattern was suggested among mitoTEMPO-treated birds (but  $p =$   
371  $0.135$ ). Moreover, in T3-3-treated individuals, the mitoTEMPO effect showed a trend to  
372 significance ( $p = 0.062$ ), here reversing the positive effect of the hormone on redness.

373 Finally, when *CYP2J19* expression level is included as another covariate in the  
374 redness model, the interaction became clearly non-significant ( $p = 0.209$ ), both treatments  
375 being subsequently removed (both  $p > 0.80$ ). This covariate then showed a significant  
376 positive relationship with redness (i.e.  $F_{1,78} = 5.52$ ,  $p = 0.021$ ; slope  $\pm$  SE:  $0.242 \pm 0.103$ ).  
377 The regression on raw data was also significant ( $r = 0.26$ ,  $p = 0.017$ , see Figure 4 and also  
378 S3).

379

380 **Discussion**

381 We have shown that *CYP2J19* expression levels at the bill epidermis positively correlates  
382 to the expression of a red carotenoid-based trait and that this link is affected by a  
383 mitochondrial antioxidant and a thyroid hormone. T3-treated birds as a single group  
384 showed higher hormone levels than controls, as well as higher respiratory frequency and  
385 body mass loss, being also engaged in moult. These effects are well-supported by avian  
386 literature (Elliott *et al.* 2013; Welcker *et al.* 2013; McNabb & Darras 2015; Perez *et al.*  
387 2018; also SM) and indicate that implants were effective. Moreover, birds with the longest  
388 and shortest T3 implants differed in body mass loss, which suggests that the T3 dosage  
389 was also relevant. Bill redness and *CYP2J19* expression variability support this view. We

390 should, hence, assume that the lack of significant differences in circulating hormone  
391 levels among T3-1 to T3-3 groups was probably due to feedback regulation (Leung,  
392 Taylor & Van Iderstine 1985; Hull *et al.* 1995; Perez *et al.* 2018), with the effects on  
393 target tissues, anyway, differing.

394 First, we should address the question of why mitoTEMPO-treated birds lost less  
395 body mass than other individuals. It contradicts studies where rodents fed with a high  
396 caloric diet did not gain mass when treated with this compound (Jeong *et al.* 2016;  
397 Gutiérrez-Tenorio *et al.* 2017). Here, mitoTEMPO seems to buffer the body mass loss  
398 probably derived from handling stress (see McGraw, Lee & Lewin 2011). In fact,  
399 contrarily to typical fatness induced by reduced locomotor activity under captivity, most  
400 of our birds lost body mass (Figure 3). Anyway, the addition of body mass change (%) as  
401 a covariate to the redness model, even when negatively correlated (birds gaining mass  
402 losing redness), did not alter our results (Table S2 and Figure S2). Moreover, this body  
403 mass change did not correlate with *CYP2J19* expression (covariate always  $p > 0.80$ ).

404 In regard to *CYP2J19*, we must first highlight that mitoTEMPO and T3 treatments  
405 did not influence circulating carotenoid levels, and the addition of plasma carotenoid  
406 values as a covariate to the *CYP2J19* model, even when correlated, did not alter the  
407 results. Therefore, the experimental effects appear to be, at least partially, independent of  
408 changes in substrate availability (yellow carotenoids; McGraw & Toomey 2010). This  
409 may support recent ideas suggesting that carotenoid-based signalling is not dependent on  
410 resource allocation trade-offs (Koch & Hill 2018) as often defended (e.g. Alonso-Alvarez  
411 *et al.* 2008; García-de Blas, Mateo & Alonso-Alvarez 2016).

412 Moreover, we detected a significant interaction between mitoTEMPO and T3  
413 treatments on *CYP2J19* expression, but the results did not follow our initial predictions  
414 (Figure 4). Contrarily to our expectations, mitoTEMPO downregulated *CYP2J19*

415 expression among hormone controls, although this was not reflected in bill redness  
416 variability (see also below). Such a ketolase downregulation apparently contradicts the  
417 effects of another mito-targeted molecule (mitoQ) that improved zebra finch bill redness  
418 (Cantarero & Alonso-Alvarez 2017). We argue that this is a consequence of subtle  
419 differences in the action mechanisms of mitoQ and mitoTEMPO. The first is a synthetic  
420 ubiquinone that improves electron transfer at the IMM, whereas mitoTEMPO is a  
421 superoxide dismutase (SOD) mimetic that favours ubiquinone recycling by reducing  
422 superoxide production (Murphy & Smith 2007; Trnka *et al.* 2008; Dikalova *et al.* 2010).  
423 Another difference is the shorter length of the alkyl chain of mitoTEMPO compared to  
424 mitoQ. This is likely to have improved the antioxidant action, avoiding disruption of the  
425 mitochondrial membrane and higher superoxide production (Reily *et al.* 2013; Trnka,  
426 Elkalaf & Anděl 2015; Gottwald *et al.* 2018). In this regard, a comparison of the effects  
427 of mitoQ and a very similar compound (mitoTEMPOL) in human cancer cell lines  
428 revealed lower levels of superoxide generation in those cells treated with the second  
429 compound (Pokrzywinski *et al.* 2016). We thus hypothesize that mitoTEMPO induced a  
430 strong reduction in superoxide levels (see Dikalova *et al.* 2010) that could have disrupted  
431 cell redox signalling mechanisms linked to ketolase gene expression. We note that  
432 superoxide is a well-known redox signal affecting the expression of many genes  
433 (reviewed in Hurd & Murphy 2009; Weidinger & Kozlov 2015). In support of this, it has  
434 been shown that mitoTEMPO can induce downregulation of human inflammatory and  
435 cancer-related genes by interfering redox signalling pathways as a result of a decline in  
436 mitochondrial superoxide generation (Nazarewicz *et al.* 2013; McCarthy & Kenny 2016).  
437 The inhibitory effect of mitoTEMPO on *CYP2J19* expression also contradicts a  
438 recent study where male captive red crossbills treated with the same compound and  
439 dosage have regrown redder feathers after plucking (Cantarero *et al.* 2019 preprint).

440 Interestingly, in that study, the effect was only detected among the reddest birds at the  
441 start of the experiment (supposedly the high-quality animals; Cantarero *et al.* 2019  
442 preprint). This strongly points to other factors controlling mitoTEMPO action on ketolase  
443 activity. Perhaps the answer comes from the mitoTEMPO x T3 interaction here showed.

444 Thus, the mitoTEMPO-induced *CYP2J19* downregulation showed in hormone  
445 controls disappeared from T3-1 to T3-2 (Figure 4A). The hormone treatment effect on  
446 antioxidant controls, in fact, inhibited *CYP2J19* expression throughout the same dosage  
447 range. As previously mentioned, in mammals, but also birds, thyroid hormones have been  
448 linked to high ROS generation and oxidative stress (reviewed in Venditti & Meo 2006;  
449 Rey *et al.* 2013; Venditti *et al.* 2015) due to increased oxidative metabolism (i.e. oxygen  
450 consumption rate) (e. g. Hulbert 2000), and we know that ROS can inhibit CYP levels  
451 and activity (see El-Kadi *et al.* 2000 for an example of oxidative stress on P450 activity).  
452 The presence of the mito-targeted antioxidant mitoTEMPO at T3-2 dosage reversed the  
453 inhibitory effect of T3 and even induced higher ketolase expression compared to hormone  
454 controls treated with the antioxidant. Subsequently, at the highest T3 dosage, the birds  
455 seem to be able to trigger some compensatory mechanism as *CYP2J19* expression  
456 apparently increased (Figure 4A).

457 Literature from mammalian models supports the capacity of thyroid hormones to  
458 mount compensatory/protective responses against its own pro-oxidant effects (e.g.  
459 reviewed in Villanueva, Alva-Sánchez & Pacheco-Rosado 2013; Goharbari,  
460 Shadboorestan & Abdollahi 2016). For example, in rats, hyperthyroidism leads to  
461 increased activity of thioredoxin/peroxiredoxin enzymes transforming hydrogen peroxide  
462 (derived from superoxide) to water (Venditti *et al.* 2015). T3 can also upregulate genes  
463 involved in mitochondrial biogenesis, thus reducing mitochondrial damage accumulation  
464 (Weitzel & Alexander Iwen 2011) or directly upregulating gene expression of different

465 p450 enzymes (Brtko & Dvorak 2011; Tee *et al.* 2011). In birds, T3-treated chicken  
466 increased SOD activity compared to controls, which apparently avoided oxidative  
467 damage (Lin, Decuyper & Buyse 2008). In the same line, T3-treated Muscovy ducklings  
468 (*Cairina moschata*) upregulated the gene expression of uncoupling proteins (UCPs)  
469 located at the IMM, which are involved in decoupling cell respiration from ATP synthesis  
470 allowing a decrease in superoxide generation (e.g. Rey *et al.* 2010). In any event,  
471 mitoTEMPO seems to be able to disable that compensatory mechanism (see Figure 4 at  
472 T3-3), perhaps by interfering in redox signalling such as suggested for the hormone  
473 control group (above).

474       Although *CYP2J19* expression levels and redness showed the same pattern of  
475 change at the two highest T3 dosages (Figure 4), the correlation between both variables  
476 is far from perfect (Figure 5). Thus, the mitoTEMPO-induced *CYP2J19* downregulation  
477 did not lead to paler bills among hormone controls. This perhaps reveals a delay in the  
478 mitoTEMPO effect as colouration could not only depend on the number of ketolase copies  
479 but on ketolase activity. Moreover, colouration effects could also have been mediated by  
480 post-transcriptional regulation attenuating the impairing effect on colouration (e.g.  
481 Smutny, Mani & Pavek 2013). The fact that *CYP2J19* expression and redness variabilities  
482 varied in concert at the highest T3 dosages may suggest that the mitoTEMPO impact on  
483 the phenotype was quicker under the hypermetabolic effects of the thyroid hormone.

484       Overall, our results reveal an interacting effect of mitochondrial antioxidant  
485 metabolism and thyroid hormones that suggests that certain levels of superoxide are  
486 needed to maintain efficient carotenoid biotransformation (see also García-de Blas,  
487 Mateo & Alonso-Alvarez 2016). Understanding this mechanism would require future  
488 correlational and experimental approaches. This includes determining mitochondrial  
489 superoxide production changes as well as variability in ketocarotenoid concentrations at

490 the ornament tissue. Nonetheless, this is the first study showing a positive significant  
491 correlation between *CYP2J19* expression level and red colouration in any species.  
492 Moreover, mitoTEMPO effects give additional support to the hypothesis that the  
493 mitochondrion is involved in colour-based sexual signalling (Johnson & Hill 2013;  
494 Cantarero & Alonso-Alvarez 2017), also supporting that red ketocarotenoid-based  
495 ornaments could act as indices revealing the individual capacity to efficiently perform  
496 cell respiration under a sexual selection scenario (Hill 2011; Hill & Johnson 2012).  
497 Finally, thyroid effects on avian carotenoid-based colouration have virtually been  
498 ignored. We have only been able to find a single study (Schereschewsky 1929), where  
499 male bullfinches (*Pyrrhula pyrrhula*) supplied with a thyroid extract moulted paler  
500 plumages, which may support some of our findings. Our results thus open a landscape for  
501 future studies.

502

### 503 **References**

- 504 Alonso-Alvarez, C., Pérez-Rodríguez, L., Mateo, R., Chastel, O. & Viñuela, J. (2008)  
505 The oxidation handicap hypothesis and the carotenoid allocation trade-off.  
506 *Journal of Evolutionary Biology*, **21**, 1789-1797.
- 507 Biernaskie, J.M., Grafen, A. & Perry, J.C. (2014) The evolution of index signals to avoid  
508 the cost of dishonesty. *Proceedings of the Royal Society B: Biological Sciences*,  
509 **281**, 20140876.
- 510 Bolker, B.M., Brooks, M.E., Clark, C.J., Geange, S.W., Poulsen, J.R., Stevens, M.H.H.  
511 & White, J.-S.S. (2009) Generalized linear mixed models: a practical guide for  
512 ecology and evolution. *Trends in Ecology & Evolution*, **24**, 127-135.

- 513 Britton, G. (2008) Functions of Intact Carotenoids. *Carotenoids: Volume 4: Natural*  
514 *Functions* (eds G. Britton, S. Liaaen-Jensen & H. Pfander), pp. 189-212.  
515 Birkhäuser Basel, Basel.
- 516 Brtko, J. & Dvorak, Z. (2011) Role of retinoids, rexinoids and thyroid hormone in the  
517 expression of cytochrome p450 enzymes. *Current Drug Metabolism*, **12**, 71-88.
- 518 Cantarero, A. & Alonso-Alvarez, C. (2017) Mitochondria-targeted molecules determine  
519 the redness of the zebra finch bill. *Biology Letters*, **13**.
- 520 Cantarero, A., Mateo, R., Camarero, P., Alonso, D., Fernandez-Eslava, B. & Alonso-  
521 Alvarez, C. (2019) A mitochondria-targeted antioxidant affects the carotenoid-  
522 based plumage of red crossbills. *bioRxiv*, 839670.
- 523 Collin, A., Joubert, R., Swennen, Q., Damon, M., Coustard, S.M., Skiba-Cassy, S.,  
524 Everaert, N., Buyse, J. & Tesseraud, S. (2009) Involvement of thyroid hormones  
525 in the regulation of mitochondrial oxidations in mammals and birds. *Thyroid*  
526 *Hormones: Functions, Related Diseases and Uses* (eds F.S. Kuehn & M.P.  
527 Lozada), pp. 93-107.
- 528 Cui, X., Yu, S., Tamhane, A., Causey, Z.L., Steg, A., Danila, M.I., Reynolds, R.J., Wang,  
529 J., Wanzeck, K.C., Tang, Q., Ledbetter, S.S., Redden, D.T., Johnson, M.R. &  
530 Bridges, S.L. (2015) Simple regression for correcting  $\Delta$ Ct bias in RT-qPCR low-  
531 density array data normalization. *BMC genomics*, **16**, 82.
- 532 Chainy, G.B.N. & Sahoo, D.K. (2019) Hormones and oxidative stress: an overview. *Free*  
533 *Radical Research*, 1-26.
- 534 Chastel, O., Lacroix, A. & Kersten, M. (2003) Pre-breeding energy requirements: thyroid  
535 hormone, metabolism and the timing of reproduction in house sparrows *Passer*  
536 *domesticus*. *Journal of Avian Biology*, **34**, 298-306.

- 537 Dikalova, A.E., Bikineyeva, A.T., Budzyn, K., Nazarewicz, R.R., McCann, L., Lewis,  
538 W., Harrison, D.G. & Dikalov, S.I. (2010) Therapeutic targeting of mitochondrial  
539 superoxide in hypertension. *Circulation research*, **107**, 106-116.
- 540 El-Kadi, A.O.S., Bleau, A.-M., Dumont, I., Maurice, H. & du Souich, P. (2000) Role of  
541 reactive oxygen intermediates in the decrease of hepatic cytochrome P450 activity  
542 by serum of humans and rabbits with an acute inflammatory reaction. *Drug*  
543 *Metabolism and Disposition*, **28**, 1112-1120.
- 544 Elnakish, M.T., Schultz, E.J., Gearing, R.L., Saad, N.S., Rastogi, N., Ahmed, A.A.E.,  
545 Mohler, P.J. & Janssen, P.M.L. (2015) Differential involvement of various  
546 sources of reactive oxygen species in thyroxin-induced hemodynamic changes  
547 and contractile dysfunction of the heart and diaphragm muscles. *Free Radical*  
548 *Biology and Medicine*, **83**, 252-261.
- 549 Elliott, K.H., Welcker, J., Gaston, A.J., Hatch, S.A., Palace, V., Hare, J.F., Speakman,  
550 J.R. & Anderson, W.G. (2013) Thyroid hormones correlate with resting metabolic  
551 rate, not daily energy expenditure, in two charadriiform seabirds. *Biology Open*,  
552 **2**, 580-586.
- 553 Foley, J.D. & Van Dam, A. (1982) *Fundamentals of interactive computer graphics*.  
554 Addison-Wesley, Reading, MA.
- 555 Fucikova, E., Drent, P.J., Smits, N. & Van Oers, K. (2009) Handling stress as a  
556 measurement of personality in great tit nestlings (*Parus major*). *Ethology*, **115**,  
557 366-374.
- 558 García-de Blas, E., Mateo, R. & Alonso-Alvarez, C. (2016) Specific carotenoid pigments  
559 in the diet and a bit of oxidative stress in the recipe for producing red carotenoid-  
560 based signals. *PeerJ*, **4**, e2237.



- 561 Goharbari, M.H., Shadboorestan, A. & Abdollahi, M. (2016) Inhibitory effects of thyroid  
562 hormones on mitochondrial oxidative stress: a systematic review. *International*  
563 *Journal of Pharmacology*, **12**, 249-261.
- 564 Gómez, J. & Liñán-Cembrano, G. (2017) SpotEgg: an image-processing tool for  
565 automatised analysis of colouration and spottiness. *Journal of Avian Biology*, **48**,  
566 502-512.
- 567 Gottwald, E.M., Duss, M., Bugarski, M., Haenni, D., Schuh, C.D., Landau, E.M. & Hall,  
568 A.M. (2018) The targeted anti-oxidant MitoQ causes mitochondrial swelling and  
569 depolarization in kidney tissue. *Physiological Reports*, **6**, e13667.
- 570 Grafen, A. (1990) Biological signals as handicaps. *Journal of Theoretical Biology*, **144**,  
571 517-546.
- 572 Gutiérrez-Tenorio, J., Marín-Royo, G., Martínez-Martínez, E., Martín, R., Miana, M.,  
573 López-Andrés, N., Jurado-López, R., Gallardo, I., Luaces, M., San Román, J.A.,  
574 González-Amor, M., Salaces, M., Nieto, M.L. & Cachofeiro, V. (2017) The role  
575 of oxidative stress in the crosstalk between leptin and mineralocorticoid receptor  
576 in the cardiac fibrosis associated with obesity. *Scientific Reports*, **7**, 16802.
- 577 Hargitai, R., Arnold, K.E., Herényi, M., Prechl, J. & Török, J. (2009) Egg composition in  
578 relation to social environment and maternal physiological condition in the collared  
579 flycatcher. *Behavioral Ecology and Sociobiology*, **63**, 869-882.
- 580 Harper, M.-E. & Seifert, E.L. (2008) Thyroid hormone effects on mitochondrial  
581 energetics. *Thyroid*, **18**, 145-156.
- 582 Hill, G.E. (2011) Condition-dependent traits as signals of the functionality of vital cellular  
583 processes. *Ecology Letters*, **14**, 625-634.
- 584 Hill, G.E., Hood, W.R., Ge, Z., Grinter, R., Greening, C., Johnson, J.D., Park, N.R.,  
585 Taylor, H.A., Andreassen, V.A., Powers, M.J., Justyn, N.M., Parry, H.A., Kavazis,

- 586 A.N. & Zhang, Y. (2019) Plumage redness signals mitochondrial function in the  
587 house finch. *Proceedings of the Royal Society B: Biological Sciences*, **286**,  
588 20191354.
- 589 Hill, G.E. & Johnson, J.D. (2013) The mitonuclear compatibility hypothesis of sexual  
590 selection. *Proceedings of the Royal Society B: Biological Sciences*, **280**,  
591 20131314.
- 592 Hill, G.E. & Johnson, L.S. (2012) The vitamin A-redox hypothesis: a biochemical basis  
593 for honest signaling via carotenoid pigmentation. *American Naturalist*, **180**,  
594 E127-150.
- 595 Honkakoski, P. & Negishi, M. (2000) Regulation of cytochrome P450 (CYP) genes by  
596 nuclear receptors. *Biochem J*, **347**, 321-337.
- 597 Hulbert, A.J. (2000) Thyroid hormones and their effects: a new perspective. *Biological*  
598 *Reviews*, **75**, 519-631.
- 599 Hull, K.L., Janssens, W.C., Baumbach, W.R. & Harvey, S. (1995) Thyroid glands: novel  
600 sites of growth hormone action. *Journal of Endocrinology*, **146**, 449-458.
- 601 Hurd, T.R. & Murphy, M. (2009) Biological systems relevant for redox signaling and  
602 control. *Redox signaling and regulation in biology and medicine* (eds C. Jacob &  
603 P.G. Winyard). Wiley, Weinheim.
- 604 Hwang-Bo, J., Muramatsu, T. & Okumura, J. (1990) Relative biopotency of  
605 triiodothyronine and of thyroxine for inducing oxygen consumption in young  
606 chicks. *Poultry Science*, **69**, 1027-1029.
- 607 Jeong, E.-M., Chung, J., Liu, H., Go, Y., Gladstein, S., Farzaneh-Far, A., Lewandowski,  
608 E.D. & Dudley, S.C., Jr. (2016) Role of mitochondrial oxidative stress in glucose  
609 tolerance, insulin resistance, and cardiac diastolic dysfunction. *Journal of the*  
610 *American Heart Association*, **5**, e003046.

- 611 Johnson, J.D. & Hill, G.E. (2013) Is carotenoid ornamentation linked to the inner  
612 mitochondria membrane potential? A hypothesis for the maintenance of signal  
613 honesty. *Biochimie*, **95**, 436-444.
- 614 Johnstone, R.A. (1995) Honest advertisement of multiple qualities using multiple signals.  
615 *Journal of Theoretical Biology*, **177**, 87-94.
- 616 Koch, R.E. & Hill, G.E. (2018) Do carotenoid-based ornaments entail resource trade-  
617 offs? An evaluation of theory and data. *Functional Ecology*, **32**, 1908-1920.
- 618 Kot, M. & Daniel, W.A. (2011) Cytochrome P450 is regulated by noradrenergic and  
619 serotonergic systems. *Pharmacological Research*, **64**, 371-380.
- 620 Lessells, C.M. & Boag, P.T. (1987) Unrepeatable repeatabilities: a common mistake. *Auk*,  
621 **104**, 116-121.
- 622 Leung, F.C., Taylor, J.E. & Van Iderstine, A. (1985) Effects of dietary thyroid hormones  
623 on growth, plasma T3 and T4, and growth hormone in normal and hypothyroid  
624 chickens. *General and Comparative Endocrinology*, **59**, 91-99.
- 625 Lin, H., Decuypere, E. & Buyse, J. (2008) Effect of thyroid hormones on the redox  
626 balance of broiler chickens. *Asian-Australasian Journal of Animal Sciences*, **21**.
- 627 Lopes, Ricardo J., Johnson, James D., Toomey, Matthew B., Ferreira, Mafalda S.,  
628 Araujo, Pedro M., Melo-Ferreira, J., Andersson, L., Hill, Geoffrey E., Corbo,  
629 Joseph C. & Carneiro, M. (2016) Genetic basis for red coloration in birds. *Current*  
630 *Biology*, **26**, 1427-1434.
- 631 Maynard Smith, J. & Harper, D. (2003) *Animal signals*. Oxford University Press, Oxford,  
632 U.K.
- 633 McCarthy, Cathal M. & Kenny, Louise C. (2016) Mitochondrial [dys]function; culprit in  
634 pre-eclampsia? *Clinical Science*, **130**, 1179-1184.

- 635 McGraw, K.J. (2006) *Mechanics of carotenoid-based coloration*. Cambridge: Harvard  
636 University Press.
- 637 McGraw, K.J., Lee, K. & Lewin, A. (2011) The effect of capture-and-handling stress on  
638 carotenoid-based beak coloration in zebra finches. *Journal of Comparative*  
639 *Physiology A*, **197**, 683-691.
- 640 McGraw, K.J. & Toomey, M.B. (2010) Carotenoid accumulation in the tissues of zebra  
641 finches: predictors of integumentary pigmentation and implications for carotenoid  
642 allocation strategies. *Physiological and Biochemical Zoology*, **83**, 97-109.
- 643 McNabb, F.M.A. & Darras, V.M. (2015) Thyroids. *Sturkie's Avian Physiology (Sixth*  
644 *Edition)* (ed. C.G. Scanes), pp. 535-547. Academic Press, San Diego.
- 645 Mundy, Nicholas I., Stapley, J., Bennison, C., Tucker, R., Twyman, H., Kim, K.-W.,  
646 Burke, T., Birkhead, Tim R., Andersson, S. & Slate, J. (2016) Red carotenoid  
647 coloration in the zebra finch is controlled by a cytochrome P450 gene cluster.  
648 *Current Biology*, **26**, 1435-1440.
- 649 Murphy, M.P. & Smith, R.A. (2007) Targeting antioxidants to mitochondria by  
650 conjugation to lipophilic cations. *Annu Rev Pharmacol Toxicol*, **47**, 629-656.
- 651 Nazarewicz, R.R., Dikalova, A., Bikineyeva, A., Ivanov, S., Kirilyuk, I.A., Grigor'ev,  
652 I.A. & Dikalov, S.I. (2013) Does scavenging of mitochondrial superoxide  
653 attenuate cancer pro-survival signaling pathways? *Antioxidants & Redox*  
654 *Signaling*, **19**, 344-349.
- 655 Perez, J.H., Furlow, J.D., Wingfield, J.C. & Ramenofsky, M. (2016) Regulation of vernal  
656 migration in Gambel's white-crowned sparrows: Role of thyroxine and  
657 triiodothyronine. *Hormones and Behavior*, **84**, 50-56.
- 658 Perez, J.H., Meddle, S.L., Wingfield, J.C. & Ramenofsky, M. (2018) Effects of thyroid  
659 hormone manipulation on pre-nuptial molt, luteinizing hormone and testicular

- 660 growth in male white-crowned sparrows (*Zonotrichia leucophrys gambelii*).  
661 *General and Comparative Endocrinology*, **255**, 12-18.
- 662 Pokrzywinski, K.L., Biel, T.G., Kryndushkin, D. & Rao, V.A. (2016) Therapeutic  
663 targeting of the mitochondria initiates excessive superoxide production and  
664 mitochondrial depolarization causing decreased mtDNA integrity. *Plos One*, **11**,  
665 e0168283.
- 666 Reby, D. & McComb, K. (2003) Anatomical constraints generate honesty: acoustic cues  
667 to age and weight in the roars of red deer stags. *Animal Behaviour*, **65**, 519-530.
- 668 Reily, C., Mitchell, T., Chacko, B.K., Benavides, G.A., Murphy, M.P. & Darley-USmar,  
669 V.M. (2013) Mitochondrially targeted compounds and their impact on cellular  
670 bioenergetics. *Redox Biology*, **1**, 86-93.
- 671 Rey, B., Roussel, D., Romestaing, C., Belouze, M., Rouanet, J.L., Desplanches, D.,  
672 Sibille, B., Servais, S. & Duchamp, C. (2010) Up-regulation of avian uncoupling  
673 protein in cold-acclimated and hyperthyroid ducklings prevents reactive oxygen  
674 species production by skeletal muscle mitochondria. *BMC Physiol*, **10**, 5.
- 675 Rey, B., Roussel, D., Rouanet, J.-L. & Duchamp, C. (2013) Differential effects of thyroid  
676 status on regional H<sub>2</sub>O<sub>2</sub> production in slow- and fast-twitch muscle of ducklings.  
677 *Journal of Comparative Physiology B*, **183**, 135-143.
- 678 Schereschewsky, H. (1929) Einige Beiträge zum Problem der Verfärbung des Gefieders  
679 beim Gimpel. *Wilhelm Roux Arch Entwickl Mech Org*, **115**, 110-153.
- 680 Seifert, E.L., Bézaire, V., Estey, C. & Harper, M.-E. (2008) Essential role for uncoupling  
681 protein-3 in mitochondrial adaptation to fasting but not in fatty acid oxidation or  
682 fatty acid anion export. *Journal of Biological Chemistry*, **283**, 25124-25131.

- 683 Smith, R.A.J., Porteous, C.M., Gane, A.M. & Murphy, M.P. (2003) Delivery of bioactive  
684 molecules to mitochondria in vivo. *Proceedings of the National Academy of*  
685 *Sciences of the United States of America*, **100**, 5407-5412.
- 686 Smutny, T., Mani, S. & Pavek, P. (2013) Post-translational and post-transcriptional  
687 modifications of pregnane x receptor (pxr) in regulation of the cytochrome p450  
688 superfamily. *Current Drug Metabolism*, **14**, 1059-1069.
- 689 Stevens, M., Párraga, C.A., Cuthill, I.C., Partridge, J.C. & Troscianko, T.S. (2007) Using  
690 digital photography to study animal coloration. *Biological Journal of the Linnean*  
691 *Society*, **90**, 211-237.
- 692 Stradi, R., Celentano, G., Boles, M. & Mercato, F. (1997) Carotenoids in bird plumage:  
693 the pattern in a series of red-pigmented *Carduelinae*. *Comparative Biochemistry*  
694 *and Physiology Part B: Biochemistry and Molecular Biology*, **117**, 85-91.
- 695 Tee, M.K., Huang, N., Damm, I. & Miller, W.L. (2011) Transcriptional regulation of the  
696 human p450 oxidoreductase gene: hormonal regulation and influence of promoter  
697 polymorphisms. *Molecular Endocrinology*, **25**, 715-731.
- 698 Tompkins, L.M. & Wallace, A.D. (2007) Mechanisms of cytochrome P450 induction.  
699 *Journal of Biochemical and Molecular Toxicology*, **21**, 176-181.
- 700 Trnka, J., Blaikie, F.H., Smith, R.A.J. & Murphy, M.P. (2008) A mitochondria-targeted  
701 nitroxide is reduced to its hydroxylamine by ubiquinol in mitochondria. *Free*  
702 *Radical Biology and Medicine*, **44**, 1406-1419.
- 703 Trnka, J., Elkalaf, M. & Anděl, M. (2015) Lipophilic triphenylphosphonium cations  
704 inhibit mitochondrial electron transport chain and induce mitochondrial proton  
705 leak. *Plos One*, **10**, e0121837.

- 706 Twyman, H., Prager, M., Mundy, N.I. & Andersson, S. (2018) Expression of a  
707 carotenoid-modifying gene and evolution of red coloration in weaverbirds  
708 (*Ploceidae*). *Molecular Ecology*, **27**, 449-458.
- 709 Twyman, H., Valenzuela, N., Literman, R., Andersson, S. & Mundy, N.I. (2016) Seeing  
710 red to being red: conserved genetic mechanism for red cone oil droplets and co-  
711 option for red coloration in birds and turtles. *Proceedings of the Royal Society B:*  
712 *Biological Sciences*, **283**, 20161208.
- 713 Vanhooydonck, B., van Damme, R., Herrel, A. & Irschick, D.J. (2007) A performance  
714 based approach to distinguish indices from handicaps in sexual selection studies.  
715 *Functional Ecology*, **21**, 645-652.
- 716 Venditti, P. & Meo, S.D. (2006) Thyroid hormone-induced oxidative stress. *Cellular and*  
717 *Molecular Life Sciences CMLS*, **63**, 414-434.
- 718 Venditti, P., Napolitano, G., Barone, D., Coppola, I. & Di Meo, S. (2015) Effect of thyroid  
719 state on enzymatic and non-enzymatic processes in H<sub>2</sub>O<sub>2</sub> removal by liver  
720 mitochondria of male rats. *Molecular and Cellular Endocrinology*, **403**, 57-63.
- 721 Vendrov, A.E., Vendrov, K.C., Smith, A., Yuan, J., Sumida, A., Robidoux, J., Runge,  
722 M.S. & Madamanchi, N.R. (2015) NOX4 NADPH oxidase-dependent  
723 mitochondrial oxidative stress in aging-associated cardiovascular disease.  
724 *Antioxidants & Redox Signaling*, **23**, 1389-1409.
- 725 Villanueva, I., Alva-Sánchez, C. & Pacheco-Rosado, J. (2013) The role of thyroid  
726 hormones as inductors of oxidative stress and neurodegeneration. *Oxidative*  
727 *Medicine and Cellular Longevity*, **2013**, 15.
- 728 Weaver, R.J., Koch, R.E. & Hill, G.E. (2017) What maintains signal honesty in animal  
729 colour displays used in mate choice? *Philosophical Transactions of the Royal*  
730 *Society B: Biological Sciences*, **372**.

- 731 Weidinger, A. & Kozlov, A.V. (2015) Biological activities of reactive oxygen and  
732 nitrogen species: oxidative stress versus signal transduction. *Biomolecules*, **5**,  
733 472-484.
- 734 Weitzel, J.M. & Alexander Iwen, K. (2011) Coordination of mitochondrial biogenesis by  
735 thyroid hormone. *Molecular and Cellular Endocrinology*, **342**, 1-7.
- 736 Welcker, J., Chastel, O., Gabrielsen, G.W., Guillaumin, J., Kitaysky, A.S., Speakman,  
737 J.R., Tremblay, Y. & Bech, C. (2013) Thyroid hormones correlate with basal  
738 metabolic rate but not field metabolic rate in a wild bird species. *Plos One*, **8**,  
739 e56229.
- 740 Zangar, R.C., Davydov, D.R. & Verma, S. (2004) Mechanisms that regulate production  
741 of reactive oxygen species by cytochrome P450. *Toxicology and Applied*  
742 *Pharmacology*, **199**, 316-331.



743 **Figure 1.** Plasma T3 levels (A) and respiratory frequency (B) at the end of the experiment  
744 depending on the length of the implant filled with T3 (T3-1: 6 mm, T3-2: 8 mm and T3-  
745 3: 12 mm). LSM  $\pm$  SEs from the mixed model.  
746

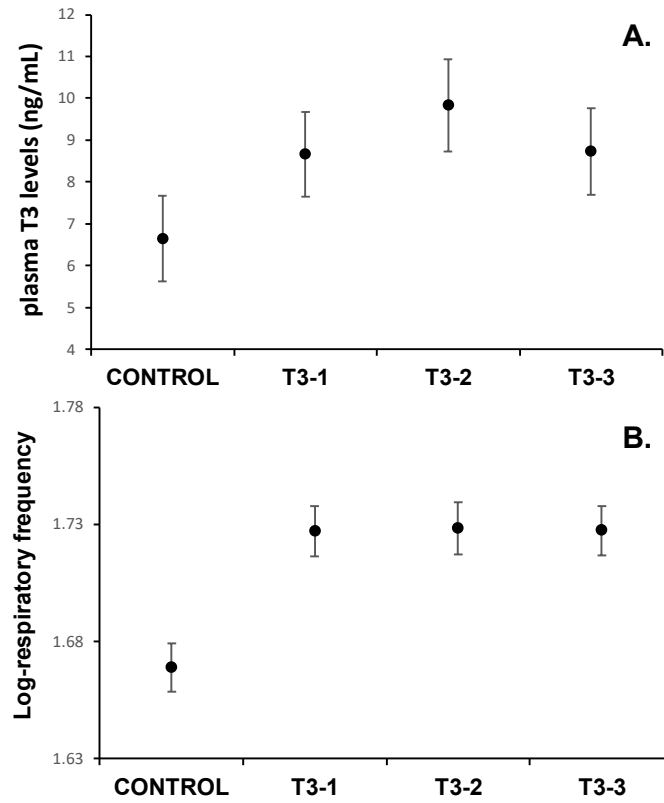

747

748

749

750 **Figure 2.** Difference between intermediate (A) and final (B) body masses regard to initial  
751 pre-experimental values depending on T3 dosage (T3-1: 6mm, T3-2: 8mm and T3-3:  
752 12mm) and antioxidant treatment (S: serum; MT: mitoTEMPO). LSM  $\pm$  SEs from mixed  
753 models controlling for body size (tarsus length) variability.  
754

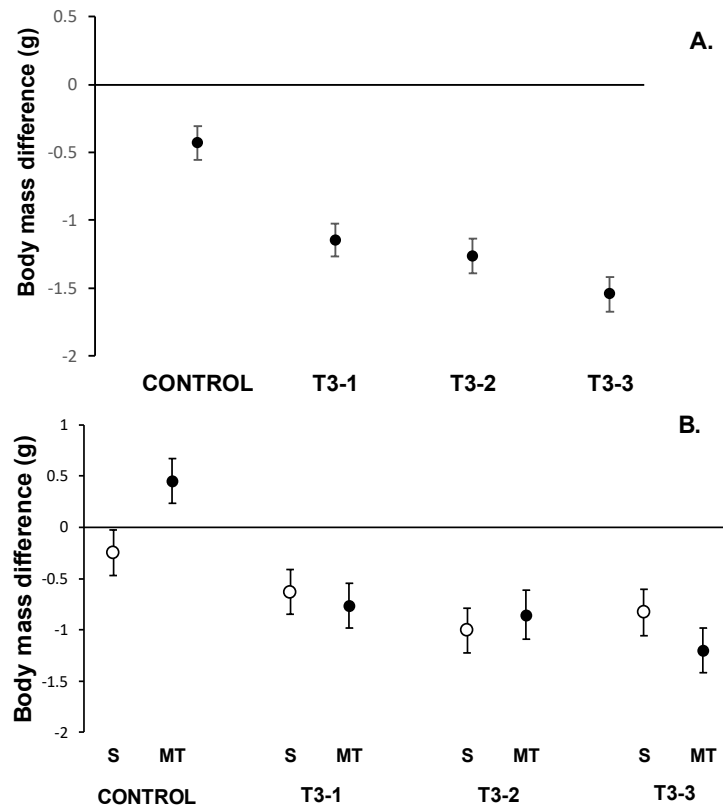

755

756

757 **Figure 3.** Treatment effects on the *CYP2J19* expression level (A) and bill redness (B).

758 See the description of variables in Methods. (S: serum only; MT: MitoTEMPO-injected

759 birds: T3-1: 6mm, T3-2: 8mm and T3-3: 12mm). LSM  $\pm$  SE from mixed models.

760

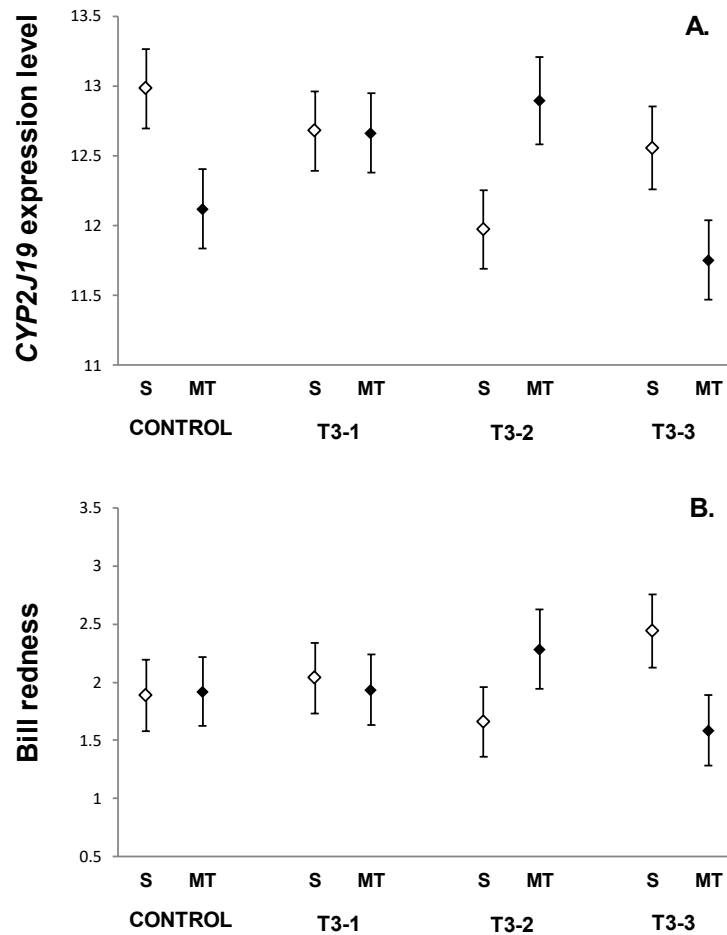

761

762

763 **Figure 4.** Relationship between male zebra finch bill redness and the expression level of  
764 the candidate enzyme for ketocarotenoid synthesis in that ornament (slope  $\pm$  SD:  $0.310 \pm$   
765  $0.127$ ). Raw data with redness as the reversed hue value (see Methods).  
766

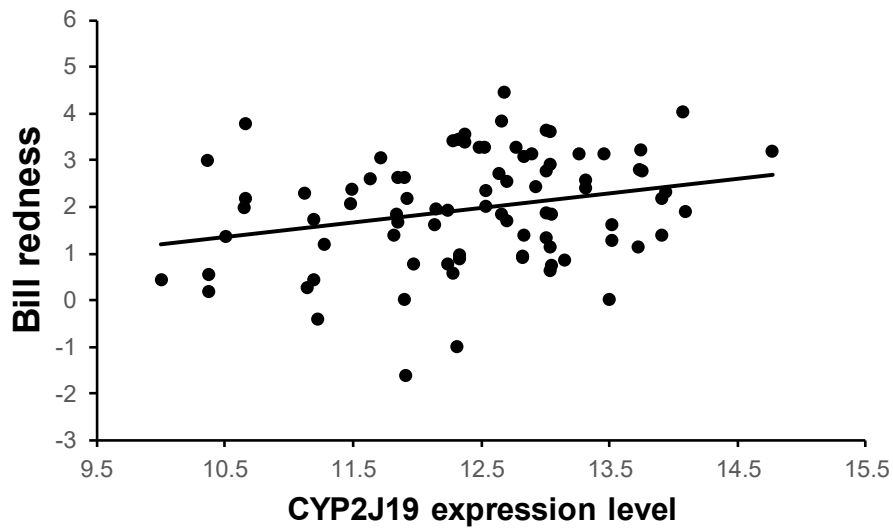

767

768 **Table 1.** Best fitted models testing body mass variability at two different sampling times  
 769 (intermediate and final, see main text).

770

| 771 | <i>Intermediate body mass</i> | <b>Slope ± SE</b> | <b>F</b> | <b>df</b> | <b>p</b> |
|-----|-------------------------------|-------------------|----------|-----------|----------|
| 772 | MitoTEMPO treatment           | -                 | 4.38     | 1,41      | 0.043    |
| 773 | T3 treatment                  | -                 | 15.09    | 3,65.7    | < 0.001  |
| 774 | Initial body mass             | -0.175 ± 0.043    | 16.52    | 1,76.9    | < 0.001  |
| 775 | Tarsus length                 | 0.244 ± 0.116     | 4.45     | 1,74.6    | 0.038    |
| 776 |                               |                   |          |           |          |
| 777 | <i>Final body mass</i>        | <b>Slope ± SE</b> | <b>F</b> | <b>df</b> | <b>p</b> |
| 778 | MitoTEMPO treatment           | -                 | 39.5     | 0.29      | 0.595    |
| 779 | T3 treatment                  | -                 | 65.3     | 2.30      | 0.085    |
| 780 | Initial body mass             | -0.173 ± 0.054    | 73.9     | 10.13     | 0.002    |
| 781 | Tarsus length                 | 0.430 ± 0.149     | 71.3     | 8.35      | 0.005    |

782

783 **Table 2.** Best fitted models testing the impact of the mitoTEMPO and T3 treatments on  
 784 male zebra finch bill *CYP2J19* expression and redness.

785

| <b><i>CYP2J19</i></b>            | <b>Slope ± SE</b> | <b><i>F</i></b> | <b>df</b> | <b><i>p</i></b> |
|----------------------------------|-------------------|-----------------|-----------|-----------------|
| MitoTEMPO treatment              | -                 | 0.71            | 1,42.2    | 0.405           |
| T3 treatment                     | -                 | 1.20            | 3,65.6    | 0.318           |
| MitoTEMPO x T3 treatments        | -                 | 4.15            | 3,67.5    | 0.009           |
| <b><i>Bill redness</i></b>       | <b>Slope ± SE</b> | <b><i>F</i></b> | <b>df</b> | <b><i>p</i></b> |
| MitoTEMPO treatment              | -                 | 0.08            | 1,38.7    | 0.777           |
| T3 treatment                     | -                 | 0.08            | 3,53.3    | 0.973           |
| MitoTEMPO x T3 treatments        | -                 | 2.42            | 3,58.6    | 0.075           |
| Location into the cage           | -                 | 9.49            | 1,29.4    | 0.004           |
| Measured area (mm <sup>2</sup> ) | 0.055 ± 0.027     | 4.22            | 1,50.6    | 0.045           |
| Initial bill redness (residuals) | 0.355 ± 0.161     | 4.85            | 1,37.5    | 0.034           |
| Bill brightness                  | -6.919 ± 1.007    | 47.18           | 1,55.8    | <.0001          |

786

# 1 **Supplementary Material**

## 2 **Additional methodological details**

3 The birds were housed at the Fundación para la Investigación en Etología y Biodiversidad  
4 (<http://es.fiebfoundation.org>). All birds were given *ad libitum* access to food (commercial  
5 pelleted food; KIKI®, Spain), water and grit. The temperature (mean  $\pm$  range  $22^\circ \pm 1^\circ\text{C}$ ) and  
6 light daily cycle (16L : 8D) were controlled.

7 A small incision with a scalpel was made in the skin of birds to introduce the implants,  
8 and surgical glue (Cicastick®) of veterinary use was used to close the wounds, though suture  
9 (two 17-70 cm stitches of Braun®, Model Novosyn Violet, 6/0 HR) was additionally used.

10 The mitoTEMPO dosage was chosen from a pilot study involving 10 male zebra  
11 finches randomly assigned to different concentrations (0, 0.334, 0.668, 1.335 and 2.67  
12 mg/Kg/day) subcutaneously injected in 50  $\mu\text{l}$  saline every other day for two weeks. The  
13 highest level (2.67 mg/Kg/day; 3mM) was chosen as we did not find a significant correlation  
14 between dose and body mass change (%; Spearman's  $r = 0.320$ ,  $p = 0.367$ ), suggesting no  
15 health impairment. Moreover, no evident toxicity symptoms (behaviour changes, fatigue,  
16 lack of alertness) were detected and the change (%) in bill redness increased with dosage  
17 (Spearman's  $r = 0.82$ ,  $p = 0.01$ ; see also Cantarero & Alonso-Alvarez 2017 for colour  
18 analysis methods)(Cantarero & Alonso-Alvarez 2017). The final dosage was, nonetheless,  
19 higher than that reported in mice (1.5 mg/Kg/day; Vendrov *et al.* 2015) where mitoTEMPO  
20 decreased mitochondrial free radical production. In the cited study, however, the antioxidant  
21 was daily administered for 84 days (here 14 days).

22 The origin of the birds (three commercial suppliers and one experimental population  
23 [i.e. IREC-CSIC; Ciudad Real, Spain]) was also balanced among antioxidant treatments  
24 ( $\chi^2=2.73$ ,  $\text{df}=3$ ,  $p = 0.435$ ), T3 implant size ( $\chi^2= 3.86$ ,  $\text{df}= 9$ ,  $p = 0.920$ ) and among the eight  
25 combinations (antioxidant x hormone groups:  $\chi^2= 10.81$ ,  $\text{df}= 21$ ,  $p = 0.966$ ).

26

## 27 **Implant rejection events**

28 The explanation to implant rejection experienced by some birds was unclear. Although we  
29 initially suspected that it could have been due to the implant sealing method, trials with  
30 different alternatives (glues or suturing the silicone tube ends) had similar rejection rates.  
31 The same Silastic® (Dow Corning) implant type has been used in avian endocrinology  
32 studies for decades (Wingfield 1984 and many articles from that researcher; see recently e.g.  
33 Noguera, Kim & Velando 2017). We suspect that silicone composition has recently subtly  
34 changed as the patented product is currently manufactured by another company (Freudenberg  
35 Medical), and we must consider that it was designed for humans/rodent models. In any event,  
36 the lack of effect of the “days with implants” covariate and also the randomized distribution  
37 of treatments among those birds losing implants suggests that the impact of implant rejection  
38 on main conclusions is likely to have been minor.

39

#### 40 **Hormone analyses**

41 Plasma aliquots were allowed to defrost and equilibrate for an hour at room temperature. A  
42 volume of 30 µl of plasma was transferred to labelled glass tubes. Hormone extraction was  
43 made by adding 3 ml of diethyl ether to the tubes, vortexing for 5 min and then centrifuging  
44 (5 min at 1500 rpm) in at 4°C. These tubes were maintained in a freezing bath of ethanol plus  
45 dry ice for 2 min. The etheric phase was transferred to a new clean tube, which was left to  
46 dry out in a warm bath under a fume hood (30 min at 40°C). This extraction protocol was  
47 performed twice. Extractions were re-suspended with 130 µl of steroid buffer (Arbor Assays,  
48 Ann Arbor, MI; ref. K056-H1) and vigorously vortexed for 5 min.

49 The measurements were performed by means of commercial ELISA kits (Arbor  
50 Assays, Ann Arbor, MI; ref. K056-H1). A microplate reader was used (Multi-detection  
51 Synergy HT; Biotek®). The standard curves provided a very good fit to standards ( $r^2 > 0.99$ ).  
52 The detection limit of the assay (80% maximum binding) was found at 0.078 ng/ml. The  
53 assays were made twice per sample (intra- and inter-assay CVs = 10.2 and 14.8 %  
54 respectively). The recoveries (%) described in another avian study using a similar ELISA kit  
55 ranged 93-113% (Elarabany, Abdallah & Said 2012). The analyses were made following the  
56 advice of Arbor Assays technicians.



57 Plasma T3 values in our control and T3-treated birds (mean  $\pm$  SD, range:  $6.64 \pm 2.68$ ,  
58  $3.83$ - $15.05$  and  $9.04 \pm 5.27$ ,  $2.48$ - $29.02$ , respectively) where within the range reported for  
59 this species in other studies (Eng, Williams & Elliott 2013; Yamaguchi *et al.* 2017).

60

### 61 **Respiratory frequency**

62 The number of breast movements in 90 seconds was counted by handing the birds face up at  
63 the left hand, with the head between the middle and forefinger. Breast movements were  
64 registered for 90 s divided into two 45 s bouts. In between these two bouts, the birds were  
65 introduced in a fabric bag while its cage mate was captured and its first bout of respiratory  
66 frequency measurement was taken (i.e. 2 min approx.). The two 45 s measurements taken to  
67 calculate the respiratory frequency value at both the beginning and end of the experiment  
68 were highly repeatable (Lessells & Boag 1987)(Lessells & Boag 1987; initial value:  $r = 0.93$ ,  
69 final value:  $r = 0.97$ , both  $p < 0.001$ ). After the measurement, the birds were weighed and  
70 bleed.

71

### 72 **Plasma carotenoid quantification**

73 Plasma aliquots were allowed to defrost for 20 min at room temperature. 10  $\mu$ l were  
74 transferred to labelled plastic tubes containing 90 $\mu$ l of absolute ethanol, being then vortexed  
75 (3 min) and centrifuged (5 min at 11000g) in a cooled centrifuge (4°C) to precipitate  
76 flocculent proteins. The absorbance of the supernatant was measured at the lutein peak (450  
77 nm) by spectrophotometric analyses, using a seven-level calibration curve obtained from  
78 serial dilution derived from a tube containing 22.5  $\mu$ g of lutein in 1500  $\mu$ L absolute ethanol.  
79 The protocol was modified from Hargitai *et al.* (2009).

80

### 81 **Digital photography**

82 For each photo, the same standard grey reference and scale (ColorChecker Classic target; X-  
83 Rite, Michigan) was placed next to the bird's head. The focus and diaphragm of the camera  
84 were manually fixed to avoid the interference of automatic functions. We have previously

85 shown that these picture-based measurements are highly correlated with the redness  
 86 measurement (i.e., red hue) obtained from portable spectrophotometers (Mougeot *et al.* 2007;  
 87 Alonso-Alvarez & Galván 2011). SpotEgg software, however, allows the user to manually  
 88 draw any region and provide information about its colouration, shape or other features. The  
 89 measure of a large delimited area, as opposed to portable spectrophotometers that analyse  
 90 colouration of reduced spots (usually 1-2 mm), makes this tool useful for evolutionary  
 91 biologists aiming to capture most of the variability among individuals (Gómez & Liñán-  
 92 Cembrano 2017). Accordingly, for each animal, the average of red, green, and blue (RGB)  
 93 components of the lateral bill surface (upper and lower mandibles) were calculated. We used  
 94 the lateral side of the bill due to the low variance of colouration at the top. We then  
 95 determined hue values by means of the Foley & van Dam algorithm (1982) (see also main  
 96 text).

97

### 98 **Additional analyses**

99 In the model testing the difference between final and initial size-corrected body mass, the  
 100 backward procedure at  $p < 0.05$  reported that only the hormone treatment factor was retained  
 101 (Table S1 and Figure S1).

102

103 **Table S1.** Mixed model testing the body mass difference between final and initial measures  
 104 controlled for body size (tarsus length) and also initial body mass.

105

| <i>Final body mass difference</i> | slope $\pm$ SE     | <i>F</i> | df     | <i>P</i> |
|-----------------------------------|--------------------|----------|--------|----------|
| T3 treatment                      | -                  | 10.58    | 3,68.2 | < 0.001  |
| Initial body mass                 | -0.155 $\pm$ 0.055 | 8.13     | 1.78.8 | 0.006    |
| Tarsus length                     | 0.352 $\pm$ 0.149  | 5.66     | 1.77   | 0.020    |

111

112

113

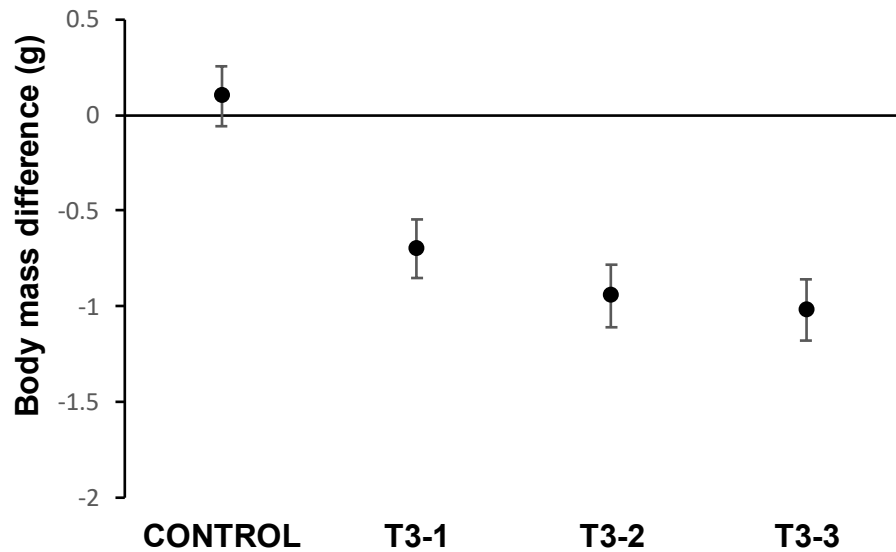

114

115 **Figure S1.** Body mass difference between final and initial measurement depending on T3  
116 dosage (T3-1: 6mm, T3-2: 8mm and T3-3: 12mm). LSM  $\pm$  SEs from mixed models.

117

118 In the model testing final bill redness, when we added body mass change during the  
119 experiment (% from initial to final measure) in order to assess hormonal effects  
120 independently of T3-mediated body mass effects, the interaction becomes significant (Table  
121 S1 and Figure S1). Here, the antioxidant effect at the highest T3 dosage is clearer ( $p = 0.032$ ;  
122 LSM  $\pm$  S.E.: mitoTEMPO:  $0.424 \pm 0.304$ ; serum:  $1.386 \pm 0.310$ ). The difference between  
123 the two highest T3 dose groups was again evident among antioxidant controls ( $p = 0.01$ ; LSM  
124  $\pm$  S.E.:  $0.550 \pm 0.297$  and  $1.386 \pm 0.310$ , for T3-2 and T3-3, respectively). Among those  
125 treated with mitoTEMPO, the T3-2 vs T3-3 comparison reported a  $p$ -value =  $0.079$  (LSM  $\pm$   
126 S.E.:  $1.228 \pm 0.332$  and  $0.424 \pm 0.304$ , for T3-2 and T3-3, respectively), thus suggesting that  
127 birds became paler at the highest dose.

128

129

130

131

132

133 **Table S2.** Model testing the impact of mitoTEMPO and T3 treatments on male bill redness  
134 when controlling for body mass change (%; bold) and other factor and covariates.

|                             | Slope ± S.E.          | <i>F</i>    | df             | <i>p</i>     |
|-----------------------------|-----------------------|-------------|----------------|--------------|
| mitoTEMPO treatment         | -                     | 0.05        | 1, 40.2        | 0.828        |
| T3 treatment                | -                     | 0.22        | 3, 55.5        | 0.885        |
| MitoTEMPO x T3 treatments   | -                     | 3.40        | 3, 56.8        | 0.024        |
| Cage side                   | -                     | 7.56        | 1, 30.2        | 0.010        |
| Measurement area            | 0.058 ± 0.026         | 5.18        | 1, 47.7        | 0.027        |
| Initial Redness (residuals) | 0.276 ± 0.153         | 3.25        | 1, 36.2        | 0.0797       |
| Final bill brightness       | -6.999 ± 0.958        | 53.39       | 1, 52.4        | <.0001       |
| <b>Body mass change (%)</b> | <b>-0.042 ± 0.017</b> | <b>6.08</b> | <b>1, 48.6</b> | <b>0.017</b> |

135

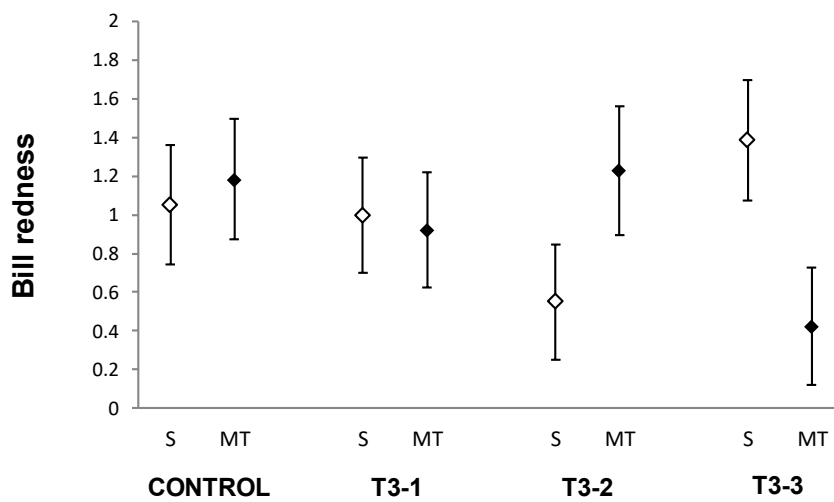

136

137 **Figure S2.** Treatment effects on the bill redness. Bill redness was the result of reversing the  
138 hue value (x -1) making data positive by adding a fixed value of 11 (see main text; S: serum  
139 only; MT: MitoTEMPO-injected birds: T3-1: 6mm, T3-2: 8mm and T3-3: 12mm). LSM  $\pm$   
140 SE from mixed models controlling for body mass change (%) during the experiment (see  
141 Results).

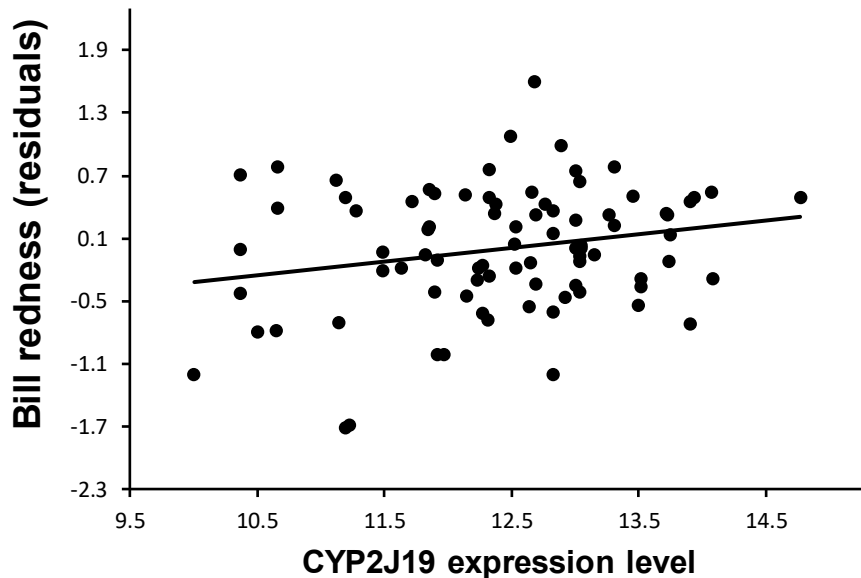

142

143 **Figure S3.** The relationship between bill redness and CYP2J19 expression level. The redness  
144 level is here controlled for any other term in the redness model (bill area, brightness, side of  
145 the cage and cage identity random factor). See Results section in the main text for the slope  
146  $\pm$  SE and other details.

147

#### 148 **Other significant terms in the redness model**

149 In the model testing bill redness (Table 2 in the main text), the location into the cage affected  
150 the dependent variable. The bill of those birds placed at the left side was redder than the bill  
151 of birds at the right side (LSM  $\pm$  S.E.: 1.239  $\pm$  0.157 and 0.699  $\pm$  0.157, respectively). This  
152 could perhaps be interpreted as birds in the right side being subtly exposed to higher stress  
153 levels inhibiting red colouration production. In this regard, we must note that maintenance  
154 work daily made (water and food supply) was always made from the left to the right side of  
155 the cage. This may have exposed to birds placed in the right side to higher disturbance as  
156 both cage sides were only separated by a grille, the bird on the right side enduring more time  
157 of disturbance. This apparently subtle influence did only induce a significant effect in the  
158 case of the redness model.

159           Regarding other significant terms in the same model (Table 2 in the main text), the  
160 bill area was positively related to redness, i.e. larger bills were redder. We have not found a  
161 reasonable technical explanation to this effect, though it could be related to individual quality.

162           The initial bill redness, as well as bill brightness at the sampling time, were positively  
163 and negatively, respectively, related to final bill redness (Table 2 in the main text). This  
164 would, respectively, mean that bill redness was individually repeatable and paler bills  
165 reflected more light.

166

## 167 **References**

- 168 Alonso-Alvarez, C. & Galván, I. (2011) Free radical exposure creates paler carotenoid-based  
169 ornaments - a possible interaction in the expression of black and red traits. *Plos One*, **6**,  
170 e19403.
- 171 Cantarero, A. & Alonso-Alvarez, C. (2017) Mitochondria-targeted molecules determine the redness  
172 of the zebra finch bill. *Biology Letters*, **13**.
- 173 Elarabany, N.F., Abdallah, G.A. & Said, A.E. (2012) Seasonal variations of steroid hormones and  
174 triiodothyronine concentrations in migratory northern shovelers. *Journal of Experimental*  
175 *Zoology Part A: Ecological Genetics and Physiology*, **317**, 216-226.
- 176 Eng, M.L., Williams, T.D. & Elliott, J.E. (2013) Developmental exposure to a brominated flame  
177 retardant: An assessment of effects on physiology, growth, and reproduction in a songbird,  
178 the zebra finch. *Environmental Pollution*, **178**, 343-349.
- 179 Foley, J.D. & Van Dam, A. (1982) *Fundamentals of interactive computer graphics*. Addison-Wesley,  
180 Reading, MA.
- 181 Gómez, J. & Liñán-Cembrano, G. (2017) SpotEgg: an image-processing tool for automatised analysis  
182 of colouration and spottiness. *Journal of Avian Biology*, **48**, 502-512.
- 183 Hargitai, R., Arnold, K.E., Herényi, M., Prechl, J. & Török, J. (2009) Egg composition in relation to  
184 social environment and maternal physiological condition in the collared flycatcher.  
185 *Behavioral Ecology and Sociobiology*, **63**, 869-882.
- 186 Lessells, C.M. & Boag, P.T. (1987) Unrepeatable repeatabilities: a common mistake. *Auk*, **104**, 116-  
187 121.
- 188 Mougeot, F., Pérez-Rodríguez, L., Martínez-Padilla, J., Leckie, F. & Redpath, S.M. (2007) Parasites,  
189 testosterone and honest carotenoid-based signalling of health. *Functional Ecology*, **21**, 886-  
190 898.

- 191 Noguera, J.C., Kim, S.Y. & Velando, A. (2017) Family-transmitted stress in a wild bird. *Proceedings*  
192 *of the National Academy of Sciences*, **114**, 6794-6799.
- 193 Vendrov, A.E., Vendrov, K.C., Smith, A., Yuan, J., Sumida, A., Robidoux, J., Runge, M.S. &  
194 Madamanchi, N.R. (2015) NOX4 NADPH oxidase-dependent mitochondrial oxidative stress  
195 in aging-associated cardiovascular disease. *Antioxidants & Redox Signaling*, **23**, 1389-1409.
- 196 Wingfield, J.C. (1984) Environmental and endocrine control of reproduction in the song sparrow,  
197 *Melospiza melodia*. II. Agonistic interactions as environmental information stimulating  
198 secretion of testosterone. *General and Comparative Endocrinology*, **56**, 417-424.
- 199 Yamaguchi, S., Hayase, S., Aoki, N., Takehara, A., Ishigohoka, J., Matsushima, T., Wada, K. &  
200 Homma, K.J. (2017) Sex differences in brain thyroid hormone levels during early post-  
201 hatching development in zebra finch (*Taeniopygia guttata*). *Plos One*, **12**, e0169643.
